# Supplementary material
Source: PubMed Central journal article supplement (PMC2890281)
Supplement: NIHMS206069-supplement-supplement_1.pdf [file NIHMS206069-supplement-supplement_1.pdf]

## ONLINE SUPPLEMENT

### Short Telomeres and Prognosis of Hypertension in a Chinese Population

Running title: Telomere and prognosis of hypertension

Zhiwei Yang<sup>1,6</sup>, Xin Huang<sup>1,6</sup>, Hong Jiang<sup>2</sup>, Yanrong Zhang<sup>1</sup>, Hongxia Liu<sup>1</sup>, Chuan Qin<sup>1</sup>,  
Gilbert M. Eisner<sup>3</sup>, Pedro Jose<sup>4</sup>, Lenhard Rudolph<sup>5,\*</sup>, Zhenyu Ju<sup>1,5,\*</sup>

1. Institute of Laboratory Animal Sciences and Max-Planck-Partner Group on Stem Cell Aging, Chinese Academy of Medical Sciences, Beijing 100021, China
2. Kidney Disease Center, The First Affiliated Hospital, College of Medicine, Zhejiang University, 310003, China
3. Department of Medicine, Georgetown University Medical Center, Washington, DC, USA
4. Department of Pediatrics, Georgetown University Medical Center, Washington, DC, USA.
5. Institute of Molecular Medicine and Max Planck Research Group on Stem Cell Aging, University of Ulm, 89081 Ulm, Germany
6. These authors contributed equally to the work.

\* Corresponding author:

Zhenyu Ju, Institute of Laboratory Animal Sciences and Max-Planck-Partner Group on Stem Cell Aging, Chinese Academy of Medical Sciences

Panjiayuan Nanli 5, Chaoyang District, Beijing 100021, China

E-mail: [zhenyuju@hotmail.com](mailto:zhenyuju@hotmail.com)

Tel: 0086-10-67776051; Fax: 0086-10-67776838

Lenhard Rudolph, Institute of Molecular Medicine and Max Planck Research Group on Stem Cell Aging, University of Ulm, Albert-Einstein-Allee 11, 89081 Ulm, Germany

E-mail: [Lenhard.Rudolph@uni-ulm.de](mailto:Lenhard.Rudolph@uni-ulm.de)

Tel.:0049-731-50-36100/101; Fax: 0049-731-50-36102

Table S1. Comparison between recruited participants and excluded participants

| Characteristics                      | Included   | Excluded   | P     |
|--------------------------------------|------------|------------|-------|
| n (men/women)                        | 393/374    | 63/70      | 0.410 |
| n (Case/Control)                     | 388/379    | 62/71      | 0.398 |
| Age (years)                          | 52.9(9.6)  | 52.6(10.4) | 0.237 |
| Body mass index (kg/m <sup>2</sup> ) | 25.4(3.27) | 25.5(3.28) | 0.875 |
| Systolic blood pressure (mmHg)       | 130(18)    | 129(16)    | 0.144 |
| Diastolic blood pressure (mmHg)      | 84.4(11)   | 84.8(10)   | 0.296 |
| Fasting blood glucose (mmol/l)       | 5.58(1.42) | 5.74(1.48) | 0.329 |
| Serum triglycerides (mmol/l)         | 1.78(1.46) | 1.68(1.48) | 0.668 |
| Serum total cholesterol (mmol/l)     | 4.92(0.94) | 5.04(1.05) | 0.110 |
| HDL (mmol/l)                         | 1.67(0.53) | 1.73(0.51) | 0.601 |
| Blood urine nitrogen (mmol/l)        | 4.75(1.8)  | 4.95(2.1)  | 0.142 |
| Serum creatinine (μmol/l)            | 78.8(12.4) | 80.9(13.2) | 0.218 |

HDL stands for High-density lipoprotein cholesterol

Table S2. Linear regression analysis on characteristics and telomere length ratio

| Characteristics          | Unstandardized Coefficients | Std. Error | Standardized Coefficients | t      | Sig. |
|--------------------------|-----------------------------|------------|---------------------------|--------|------|
| Constant                 | 1.102                       | .229       |                           | 4.814  | .000 |
| Body mass index          | -.012                       | .005       | -.108                     | -2.213 | .027 |
| Fasting blood glucose    | -.028                       | .013       | -.098                     | -2.065 | .040 |
| Diastolic blood pressure | -.006                       | .002       | -.168                     | -3.380 | .001 |
| Gender                   | -.006                       | .036       | -.007                     | -.156  | .876 |
| Age                      | -.010                       | .002       | -.233                     | -4.806 | .000 |

Dependent Variable: log transformed telomere length ratio

Table S3. Linear regression analysis on characteristics and telomere length ratio

| Characteristics          | Unstandardized Coefficients | Std. Error | Standardized Coefficients | t      | Sig. |
|--------------------------|-----------------------------|------------|---------------------------|--------|------|
| Constant                 | .126                        | .291       |                           | .434   | .665 |
| Body mass index          | -.006                       | .005       | -.055                     | -1.148 | .252 |
| Fasting blood glucose    | -.015                       | .013       | -.053                     | -1.141 | .254 |
| Diastolic blood pressure | -.001                       | .002       | -.036                     | -.669  | .504 |
| Gender                   | .002                        | .035       | .003                      | .058   | .954 |
| Age                      | -.009                       | .002       | -.213                     | -4.516 | .000 |
| Hypertension             | .215                        | .041       | .285                      | 5.190  | .000 |

Dependent Variable: log transformed telomere length ratio

Table S4. Comparison of characteristics between follow-up and drop-out subjects

| Characteristics          | Drop-out         | Follow-up        | P     |
|--------------------------|------------------|------------------|-------|
| n (men/women)            | 188/168          | 202/209          | 0.312 |
| n (Case/Control)         | 167/189          | 221/190          | 0.058 |
| Age (years)              | 52.8(10)         | 52.9(9.4)        | 0.151 |
| Telomere length ratio    | 0.60[0.48, 0.74] | 0.63[0.51, 0.87] | 0.122 |
| BMI (kg/m <sup>2</sup> ) | 25.2(3.1)        | 25.6(3.4)        | 0.073 |
| SBP (mmHg)               | 130(18)          | 131(18)          | 0.507 |
| DBP (mmHg)               | 84.2(10.7)       | 84.5(11.2)       | 0.776 |
| Fasting glucose (mmol/l) | 5.60(1.49)       | 5.55(1.33)       | 0.537 |
| Triglycerides (mmol/l)   | 1.67(1.21)       | 1.81(1.37)       | 0.437 |
| TC (mmol/l)              | 4.93(0.97)       | 4.91(0.90)       | 0.084 |
| HDL (mmol/l)             | 1.68(0.52)       | 1.66(0.54)       | 0.291 |
| BUN (mmol/l)             | 4.76(1.74)       | 4.73(1.91)       | 0.079 |
| SC (μmol/l)              | 79.7(13.3)       | 78.3(11.4)       | 0.491 |

BMI stands for body mass index; SBP stands for systolic blood pressure; DBP stands for diastolic blood pressure; TC stands for serum total cholesterol; HDL stands for high-density lipoprotein cholesterol; BUN stands for blood urine nitrogen; SC stands for serum creatinine.

## Figure S1.

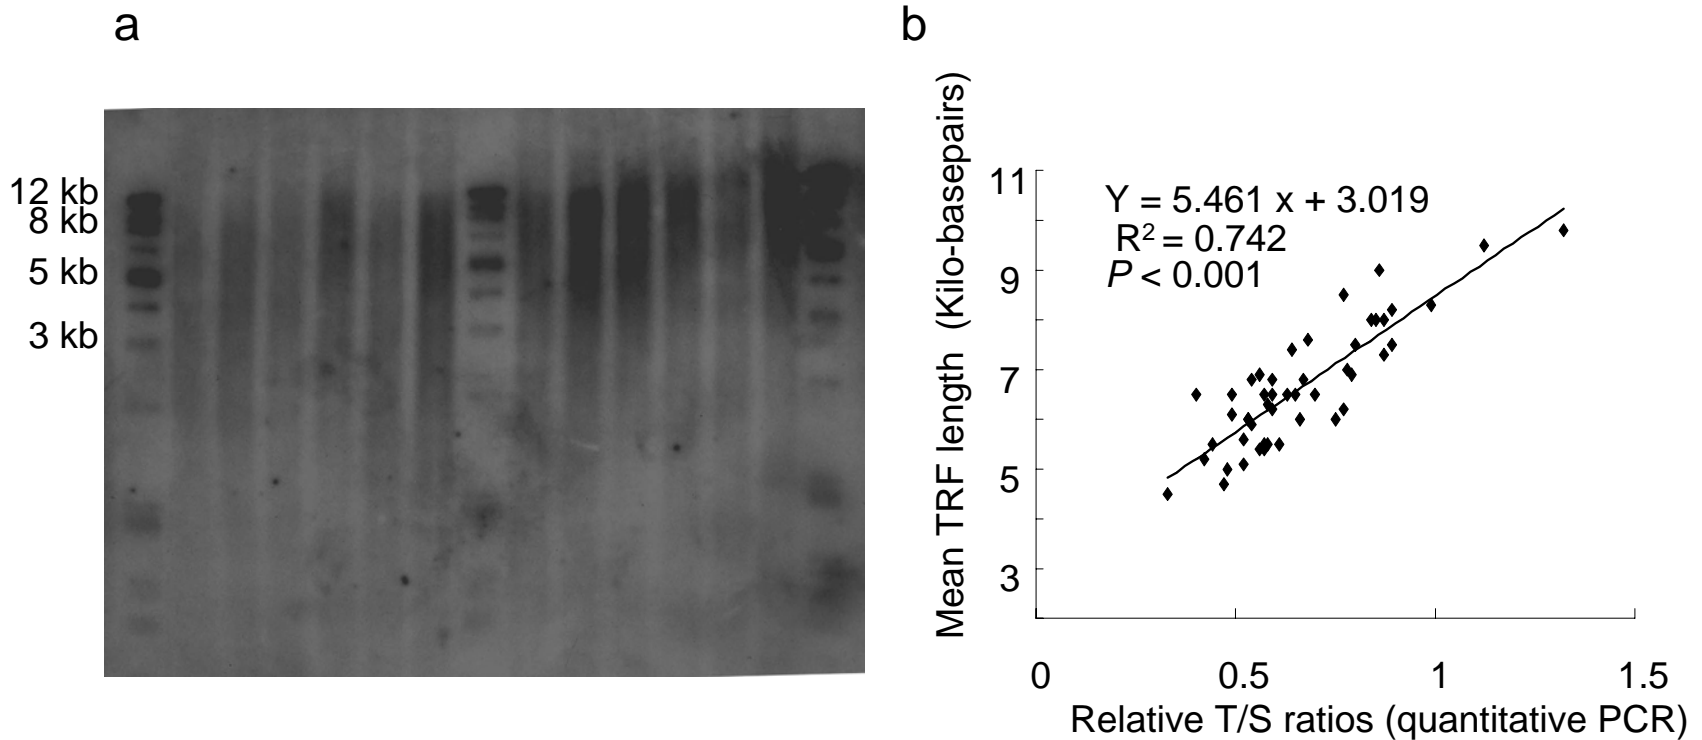

**Correlation between relative T/S ratio determined by quantitative PCR and mean TRF length determined by Southern blot.**

(a) Representative Southern blot of DNA samples from 12 individuals. (b) The histogram shows the correlation between the telomere length determined by quantitative PCR (relative T/S ratio) and the telomere length determined by Southern blot (TRF length in kilobases).
